# Supplementary material
Source: PubMed Central journal article supplement (PMC4468558)
Supplement: IAI.03071-14_zii999091269so1.pdf [file IAI.03071-14_zii999091269so1.pdf]

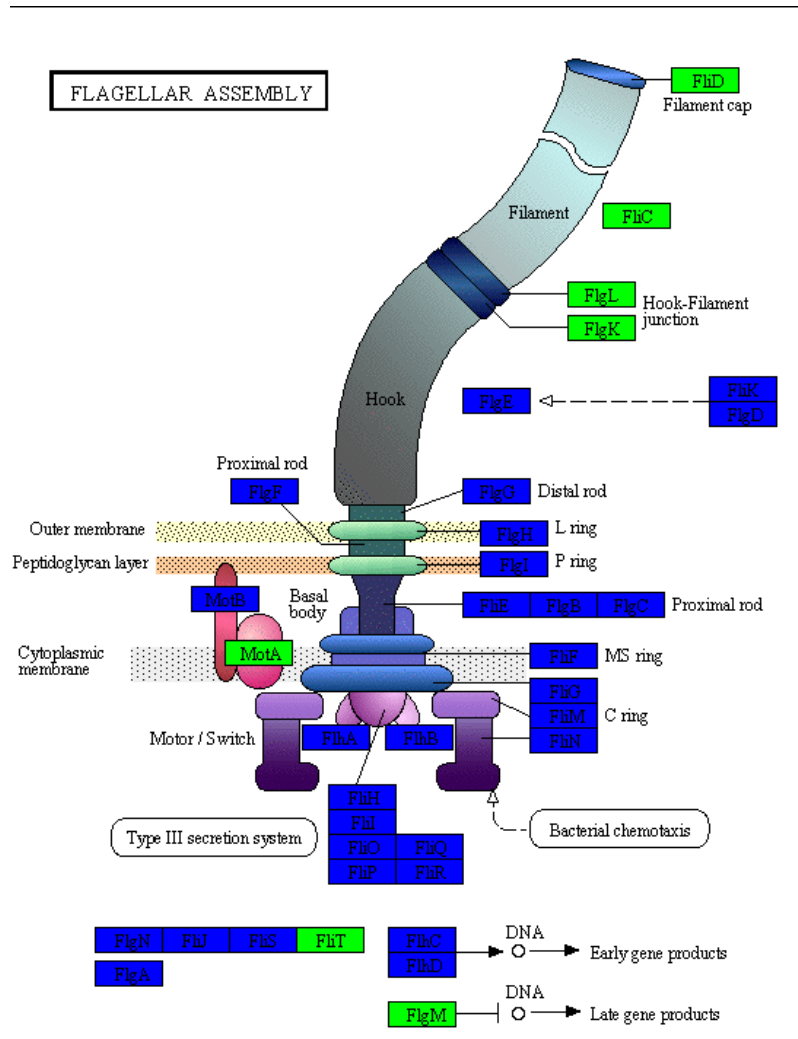

**Figure S1** The expression of flagellar genes in CF74ΔT6SS at the level of transcription. Green: obviously down-regulated genes, blue: not significantly down-regulated genes.
