# Supplementary material
Source: PubMed Central journal article supplement (PMC4468558)
Supplement: IAI.03071-14_zii999091269so2.pdf [file IAI.03071-14_zii999091269so2.pdf]

**TABLE S1** Oligonucleotides

| Primer                                   | Sequence                                   |
|------------------------------------------|--------------------------------------------|
| Primers used for mutagenesis             |                                            |
| T6-1F                                    | CCGCTCGAGACCACGGCAGTTGCCACAGG              |
| T6-2R                                    | GGAATCATTAAACGTAACAAGGAGTTACCG             |
| T6-3F                                    | TTGTTACGTTTAATGATTCCAGTTCGTTAC             |
| T6-4R                                    | ATTGCGGCCGC GGCTGGAGCAGCAGGGCAAT           |
| <i>hcp-2-up1-F</i>                       | CCGCTCGAGGGGTTTCTTTTAGTTGATTGA             |
| <i>hcp-2-up2-R</i>                       | CTGTTGATGCTTATAAACTCCTTGTTAAAGA            |
| <i>hcp-2-down3-F</i>                     | GAGTTTATAAGCATCAACAGCATCCCGCGTT            |
| <i>hcp-2-down4-R</i>                     | ATTGCGGCCGCCGTTGTATCTCCGTGCCCTG            |
| <i>clpV-up1-F</i>                        | CCGCTCGAG AGGCGTGATTATCTCGTTTCG            |
| <i>clpV-up2-R</i>                        | TGTATTCTGCATGTGTCCTTACCTGGCGAGC            |
| <i>clpV-down3-F</i>                      | AAGGACACATGCAGAATACAGACGCTCATGA            |
| <i>clpV-down4-R</i>                      | ATTGCGGCCGCAGTGCTCAGCGTCACGGCGAT           |
| <i>vgr-up1-F</i>                         | CCCTCGAGGGCAAACAGGAGCACTATTTAC             |
| <i>vgr-up2-R</i>                         | CCTTCACCGAGAATAACCTCCTGAATTAACA            |
| <i>vgr-down3-F</i>                       | GAGGTTATTCTCGGTGAAGGATAAGTTTGCC            |
| <i>vgr-down4-R</i>                       | TTGCGGCCGCAACCGCTGTCGTTTCAGTATCAG          |
| Primers used for genetic complementation |                                            |
| pBAD24 <i>vgr-F</i>                      | TCCGGTACCGTCTACAGGATTACGTTTCACACT          |
| pBAD24 <i>vgr-R</i>                      | GACAAGCTT TCAGAACTCTCTCATATCAGGCATCT       |
| pBAD24 <i>hcp-2-F</i>                    | TCCGGTACC GCCAACACCGTGTTACATC              |
| pBAD24 <i>hcp-2-R</i>                    | GACAAGCTT TTACGCTTCCAGCGGCG                |
| pBAD24 <i>clpV-F</i>                     | TCCGAATTC ACC ATGATCCAGATTGATTTGGCCACACTGG |
| pBAD24 <i>clpV-R</i>                     | GACAAGCTT TCATAGAACGGTTTTGTCCTCTGTTTCTGG   |
| Primers used for qRT-PCR                 |                                            |
| <i>qhcp-2-F</i>                          | CCAGCGTTCGCACAAGC                          |
| <i>qhcp-2-R</i>                          | AGTTCAGTTTTTCGGCAGCA                       |
| <i>qvgr-F</i>                            | CTCCTTTGTATCGCTCGGG                        |
| <i>qvgr-R</i>                            | CCGTATCGCACAGCACCA                         |
| <i>qclpV-F</i>                           | GCGACTTGAGGGTGATTACTG                      |
| <i>qclpV-R</i>                           | GGGGAGAACGACGGATAGC                        |
| <i>qflgK-F</i>                           | GGTAGGCAATGGTGTCTATGTT                     |
| <i>qflgK-R</i>                           | AGATACTGGTCGGTCGTTTAA                      |
| <i>qflgL-F</i>                           | ATGCGTATCAGCACCCAGA                        |
| <i>qflgL-R</i>                           | CCAAACTTCATCCATTCAGC                       |
| <i>qflgM-F</i>                           | AATCAGCGAGTCGGCAAT                         |
| <i>qflgM-R</i>                           | GAAAACCGCAATCCGTAAC                        |
| <i>qfliC-F</i>                           | GCATCATCAACGAATACCGC                       |
| <i>qfliC-R</i>                           | CGGGTCAAAAAGATTTACAAC                      |
| <i>qfliT-F</i>                           | GGTGAATGGGACCTTTTACTG                      |
| <i>qfliT-R</i>                           | CGTCTTTTGGCGTGTCG                          |

---

|                 |                       |
|-----------------|-----------------------|
| <i>qfliD</i> -F | CTCTGGCGTCGGGTCA      |
| <i>qfliD</i> -R | GCTGCTGGTAACTGTTGTGCT |
| <i>qgapA</i> -F | GAACGCCTTTCATCGGG     |
| <i>qgapA</i> -R | TCCGTTGTTGACCTGACTGT  |

---
