# Supplementary material
Source: PubMed Central journal article supplement (PMC4468558)
Supplement: IAI.03071-14_zii999091269so3.pdf [file IAI.03071-14_zii999091269so3.pdf]

**TABLE S2** Summary of genes down-regulated in CF74ΔT6SS

| gene_id    | gene        | product                                                           | direction | log2<br>(fold_change) | p_value |
|------------|-------------|-------------------------------------------------------------------|-----------|-----------------------|---------|
| CFCDC_1858 | <i>fadE</i> | acyl-CoA dehydrogenase                                            | -         | 4.7248                | 0.0004  |
| CFCDC_0190 | <i>dctA</i> | C4-dicarboxylate transporter DctA                                 | +         | 4.1448                | 0.0005  |
| CFCDC_0561 | <i>tdcD</i> | propionate/acetate kinase                                         | +         | 4.3434                | 0.0005  |
| CFCDC_4286 | <i>fadB</i> | multifunctional fatty acid oxidation complex subunit alpha        | +         | 4.3653                | 0.0005  |
| CFCDC_4142 | <i>eutE</i> | ethanolamine utilization protein EutE                             | -         | 5.1795                | 0.0007  |
| CFCDC_4137 | <i>eutB</i> | ethanolamine ammonia-lyase heavy chain                            | -         | 3.3633                | 0.0019  |
| CFCDC_0566 | <i>yhaN</i> | hypothetical protein                                              | +         | 3.2808                | 0.0021  |
| CFCDC_0857 | <i>fucl</i> | L-fucoseisomerase                                                 | -         | 3.2808                | 0.0022  |
| CFCDC_3969 | <i>glpT</i> | sn-glycerol-3-phosphate transporter                               | -         | 4.2163                | 0.0024  |
| CFCDC_3968 | <i>glpQ</i> | glycerophosphodiesterphosphodiesterase                            | -         | 3.9251                | 0.0023  |
| CFCDC_0730 | <i>nupG</i> | nucleoside permease                                               | -         | 3.1852                | 0.0028  |
| CFCDC_3221 | <i>ydcI</i> | LysR family transcriptional regulator                             | +         | 3.1349                | 0.0032  |
| CFCDC_3925 | <i>yejG</i> | hypothetical protein                                              | -         | 3.1227                | 0.0033  |
| CFCDC_1759 | <i>glpF</i> | glycerol uptake facilitator protein                               | -         | 3.3001                | 0.0038  |
| CFCDC_4365 | <i>rbsC</i> | ribose ABC transporter permease protein                           | -         | 3.0266                | 0.0044  |
| CFCDC_3886 | <i>mglC</i> | galactoside ABC transporter permease                              | -         | 2.9828                | 0.0049  |
| CFCDC_1758 | <i>glpK</i> | glycerol kinase                                                   | -         | 4.2824                | 0.0059  |
| CFCDC_4145 | <i>eutD</i> | phosphotransacetylase                                             | -         | 4.6111                | 0.0064  |
| CFCDC_4146 | <i>eutT</i> | putative cobalaminadenosyltransferase in ethanolamine utilization | -         | 4.9507                | 0.0066  |
| CFCDC_0555 | <i>garL</i> | 2-dehydro-3-deoxyglucarate aldolase                               | +         | 2.9971                | 0.0066  |
| CFCDC_2679 | <i>flgK</i> | flagellar hook-associated protein FlgK                            | +         | 2.7308                | 0.0081  |
| CFCDC_2777 | <i>ycgG</i> | cyclic diguanylatephosphodiesterase (EAL) domain protein          | +         | 2.8694                | 0.0081  |
| CFCDC_1404 | <i>ykgE</i> | putative dehydrogenase subunit                                    | +         | 2.8490                | 0.0086  |
| CFCDC_0133 | <i>aldB</i> | aldehyde dehydrogenase B                                          | +         | 2.6538                | 0.0091  |
| CFCDC_0972 | <i>srlE</i> | PTS system glucitol/sorbitol-specific transporter subunit IIBC    | -         | 3.2798                | 0.0101  |
| CFCDC_0970 | <i>srlD</i> | sorbitol-6-phosphate dehydrogenase                                | -         | 2.5405                | 0.0101  |
| CFCDC_2314 | <i>sdhB</i> | succinate dehydrogenase iron-sulfur subunit                       | +         | 2.6016                | 0.0103  |
| CFCDC_2434 | <i>bssR</i> | biofilm formation regulatory protein BssR                         | +         | 3.1236                | 0.0109  |
| CFCDC_0553 | <i>garD</i> | D-galactaratedehydratase                                          | -         | 2.4598                | 0.0109  |
| CFCDC_4287 | <i>fadA</i> | 3-ketoacyl-CoA thiolase (fatty oxidation complex beta subunit)    | +         | 2.5207                | 0.0112  |
| CFCDC_3603 | <i>fliD</i> | flagellar capping protein                                         | +         | 2.4715                | 0.0121  |
| CFCDC_3888 | <i>mglB</i> | galactose-binding transport protein                               | -         | 2.4402                | 0.0134  |
| CFCDC_0764 | <i>ygfH</i> | putative coenzyme A transferase                                   | -         | 2.8255                | 0.0134  |
| CFCDC_3230 | <i>cybB</i> | cytochrome b561                                                   | -         | 2.4055                | 0.0145  |
| CFCDC_4126 | <i>ucpA</i> | short chain dehydrogenase                                         | -         | 2.6212                | 0.0150  |
| CFCDC_4138 | <i>eutA</i> | reactivating factor for ethanolamine ammonia lyase                | -         | 3.2983                | 0.0156  |
| CFCDC_0580 | <i>uxaC</i> | uronateisomerase                                                  | +         | 2.4525                | 0.0169  |
| CFCDC_3274 | <i>pspE</i> | thiosulfate: cyanidesulfurtransferase                             | -         | 2.3057                | 0.0172  |
| CFCDC_1720 | <i>fdoG</i> | formate dehydrogenase-O, major subunit                            | -         | 2.8665                | 0.0173  |
| CFCDC_2712 | <i>fecA</i> | ferric citrate outer membrane transporter                         | -         | 2.2564                | 0.0193  |

|            |             |                                                              |   |        |        |
|------------|-------------|--------------------------------------------------------------|---|--------|--------|
| CFCDC_0556 | <i>garR</i> | Rossmann-fold NAD(P)(+)-binding proteins                     | + | 2.2884 | 0.0198 |
| CFCDC_2228 | <i>citX</i> | 2'-(5"-triphosphoribosyl)-3'-dephospho-CoA:apo-citrate lyase | - | 3.2284 | 0.0199 |
| CFCDC_3887 | <i>mglA</i> | galactose/methyl galactoside transporter ATP-binding protein | - | 2.2698 | 0.0209 |
| CFCDC_3435 | <i>yeaW</i> | putative 2Fe-2S cluster-containing dioxygenase subunit       | + | 2.3347 | 0.0210 |
| CFCDC_3522 | <i>cheR</i> | chemotaxismethyltransferaseCheR                              | - | 3.3468 | 0.0217 |
| CFCDC_1057 | <i>rbsA</i> | ribose transport system ATP-binding protein                  | + | 2.9488 | 0.0265 |
| CFCDC_1937 | <i>prpD</i> | 2-methylcitrate dehydratase                                  | + | 2.2329 | 0.0270 |
| CFCDC_1952 | <i>mhpR</i> | DNA-binding transcriptional activator MhpR                   | - | 2.6395 | 0.0273 |
| CFCDC_3279 | <i>pspA</i> | phage shock protein A                                        | - | 2.1112 | 0.0279 |
| CFCDC_3036 | <i>fumA</i> | fumaratehydratase class I, aerobic                           | + | 2.4143 | 0.0281 |
| CFCDC_2658 | <i>bssS</i> | biofilm formation regulatory protein BssS                    | - | 2.5172 | 0.0287 |
| CFCDC_3602 | <i>fliC</i> | bacterial flagellin C-terminal helical region                | - | 2.9404 | 0.0291 |
| CFCDC_0531 | <i>mtr</i>  | tryptophan permease                                          | + | 2.0987 | 0.0295 |
| CFCDC_1422 | <i>yjiO</i> | multidrug efflux system protein                              | - | 2.0906 | 0.0230 |
| CFCDC_3689 | <i>yeel</i> | hypothetical protein                                         | + | 2.1230 | 0.0308 |
| CFCDC_3438 | <i>fadD</i> | long-chain-fatty-acid--CoA ligase                            | - | 2.0986 | 0.0311 |
| CFCDC_1060 | <i>iolC</i> | 5-dehydro-2-deoxygluconokinase                               | + | 2.3009 | 0.0339 |
| CFCDC_1757 | <i>glpX</i> | fructose 1,6-bisphosphatase II                               | - | 1.9895 | 0.0374 |
| CFCDC_1053 | <i>iolA</i> | methylmalonate-semialdehyde dehydrogenase                    | + | 2.0254 | 0.0377 |
| CFCDC_3605 | <i>fliT</i> | flagellar biosynthesis protein FliT                          | + | 2.8783 | 0.0386 |
| CFCDC_0378 | <i>bfd</i>  | bacterioferritin-associated ferredoxin                       | + | 3.0138 | 0.0388 |
| CFCDC_1962 | <i>fbpC</i> | ferric transporter ATP-binding subunit                       | - | 1.9560 | 0.0429 |
| CFCDC_2680 | <i>flgL</i> | flagellar hook-associated protein FlgL                       | + | 1.9116 | 0.0436 |
| CFCDC_0188 | <i>ldrD</i> | toxic polypeptide, small                                     | + | 3.3786 | 0.0434 |
| CFCDC_2668 | <i>flgM</i> | anti-sigma28 factor FlgM                                     | - | 2.1278 | 0.0464 |
| CFCDC_3529 | <i>motA</i> | flagellar motor protein MotA                                 | - | 2.7427 | 0.0466 |
| CFCDC_0291 | <i>glpD</i> | glycerol-3-phosphate dehydrogenase                           | - | 2.3828 | 0.0495 |
| CFCDC_1513 | <i>caiF</i> | DNA-binding transcriptional activator CaiF                   | + | 1.9368 | 0.0496 |
| CFCDC_2221 | <i>ybdQ</i> | hypothetical protein                                         | - | 2.3263 | 0.0450 |
