# Supplementary material
Source: PubMed Central journal article supplement (PMC4468558)
Supplement: IAI.03071-14_zii999091269so4.pdf [file IAI.03071-14_zii999091269so4.pdf]

**TABLE S3** Summary of genes up-regulated in CF74ΔT6SS

| gene_id    | gene        | product                                                                        | direction | log2<br>(fold_change) | p_value |
|------------|-------------|--------------------------------------------------------------------------------|-----------|-----------------------|---------|
| CFCDC_1139 | <i>malK</i> | maltose/maltodextrin transporter ATP-binding protein                           | +         | -3.7477               | 0.0007  |
| CFCDC_2642 | <i>csgC</i> | autoagglutination protein                                                      | +         | -11.0695              | 0.0028  |
| CFCDC_0517 | <i>dcuD</i> | C4-dicarboxylate transporter                                                   | -         | -3.2288               | 0.0029  |
| CFCDC_0476 | <i>nanK</i> | N-acetylmannosamine kinase                                                     | +         | -3.2815               | 0.0173  |
| CFCDC_1137 | <i>malF</i> | maltose transporter membrane protein                                           | -         | -2.3432               | 0.0177  |
| CFCDC_1044 | <i>evgA</i> | DNA-binding transcriptional activator EvgA                                     | +         | -3.9065               | 0.0182  |
| CFCDC_1749 | <i>sbp</i>  | sulfate-binding protein (sulfate starvation-induced protein 2)                 | +         | -2.2109               | 0.0219  |
| CFCDC_1140 | <i>lamB</i> | maltoporin                                                                     | +         | -2.4846               | 0.0255  |
| CFCDC_0153 | <i>malS</i> | periplasmic alpha-amylase precursor                                            | -         | -2.1120               | 0.0277  |
| CFCDC_3321 | <i>yeeN</i> | hypothetical protein                                                           | -         | -2.1912               | 0.0284  |
| CFCDC_2753 | <i>potD</i> | spermidine/putrescine ABC transporter periplasmic<br>substrate-binding protein | -         | -2.1112               | 0.0288  |
| CFCDC_1138 | <i>malE</i> | maltose ABC transporter periplasmic protein                                    | -         | -2.2756               | 0.0347  |
| CFCDC_1255 | <i>ecnR</i> | transcriptional regulatory protein                                             | -         | -2.0784               | 0.0412  |
| CFCDC_1829 | <i>zraP</i> | zinc resistance protein                                                        | -         | -11.1286              | 0.0443  |
| CFCDC_2975 | <i>lcrS</i> | LcrS                                                                           | -         | -10.4444              | 0.0443  |
